# Supplementary material for: Highly efficient visible/near-IR-light-driven photocatalytic H2 production over asymmetric phthalocyanine-sensitized TiO2
Source: Royal Society of Chemistry journal article supplement (doi:10.1039/c3ra41975d), 2013-01-01
Supplement: c3ra41975d.pdf [file c3ra41975d.pdf]

## Electronic Supplementary Information

### Highly efficient visible/near-IR-light-driven photocatalytic H<sub>2</sub> production over asymmetric phthalocyanine-sensitized TiO<sub>2</sub>\*\*

Xiaohu Zhang,<sup>‡,a</sup> Lijuan Yu,<sup>‡,a</sup> Chuansheng Zhuang,<sup>a</sup> Tianyou Peng,<sup>a,\*</sup> Renjie Li,<sup>a,\*</sup> and Xingguo Li<sup>b</sup>

<sup>a</sup> College of Chemistry and Molecular Science, Wuhan University, Wuhan 430072, P. R. China.

<sup>b</sup> Beijing National Laboratory for Molecular Sciences (BNLMS), College of Chemistry and Molecular Engineering, Peking University, Beijing 100190, China.

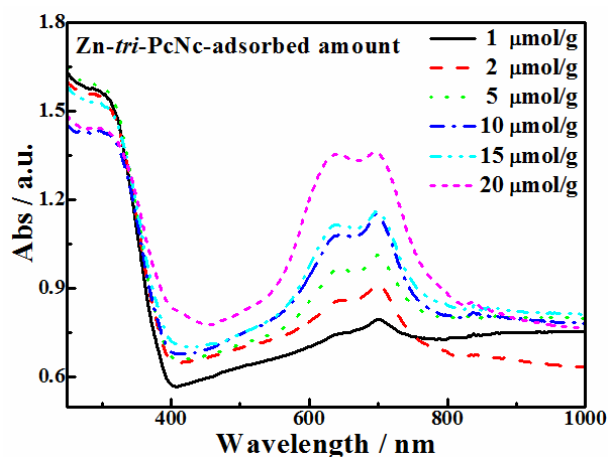

Figure S1. DRS spectra of 1.0wt% Pt-loaded *Zn-tri-PcNc*/TiO<sub>2</sub> with different dye-adsorbed contents.

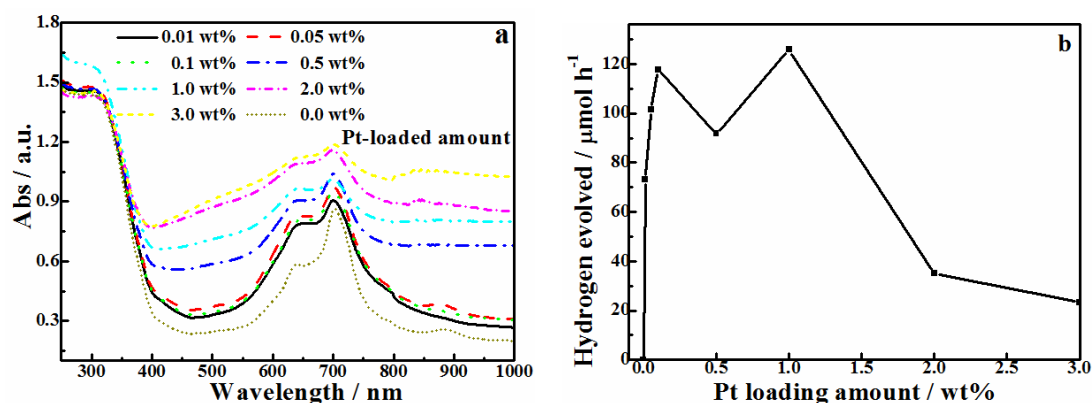

Figure S2. (a) DRS spectra of *Zn-tri-PcNc*/TiO<sub>2</sub> with different Pt-loaded levels, and (b) effect of Pt-loaded amount on the photocatalytic H<sub>2</sub> production rate over *Zn-tri-PcNc*/TiO<sub>2</sub>. Conditions: 30 mg photocatalyst with 5 μmol/g dye-adsorbed amount, 10 mM EDTA aqueous solution with original pH value (3.6-3.8) without adjusting.

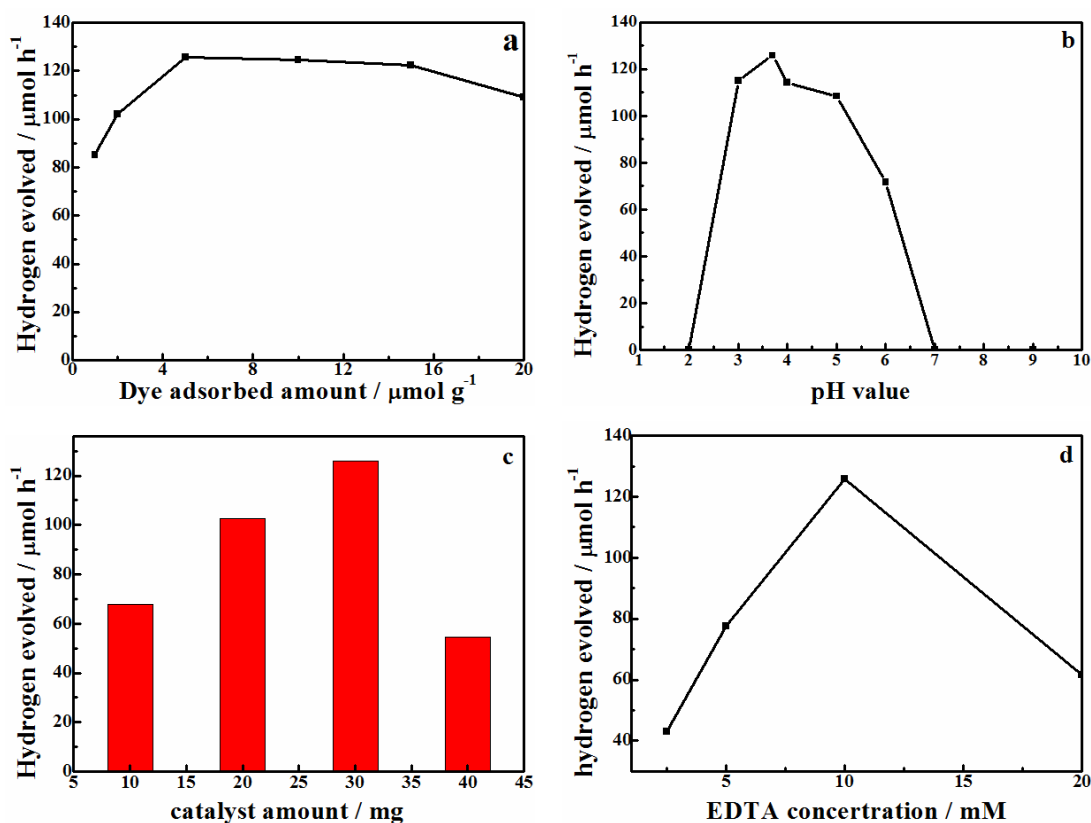

**Figure S3.** Effects of dye-adsorbed amount (a), pH value (b), photocatalyst amount (c), and EDTA concentration (d) on the photocatalytic H<sub>2</sub> production rate over Zn-tri-PcNc/TiO<sub>2</sub>. Conditions: 30 mg photocatalyst with 5  $\mu\text{mol/g}$  dye-adsorbed amount, 10 mM EDTA aqueous solution with original pH value (3.6-3.8) without adjusting if otherwise statement.

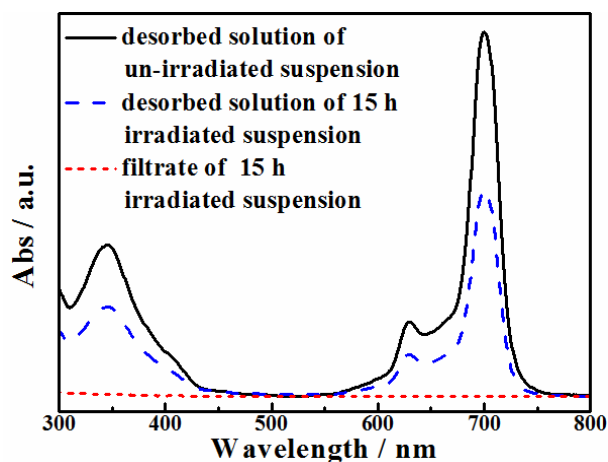

**Figure S4.** UV-vis absorption spectra: filtrate of Zn-tri-PcNc/TiO<sub>2</sub> suspension after 15h irradiation; desorbed solution of un-irradiated Zn-tri-PcNc/TiO<sub>2</sub> suspension; desorbed solution of 15h irradiated Zn-tri-PcNc/TiO<sub>2</sub> suspension.

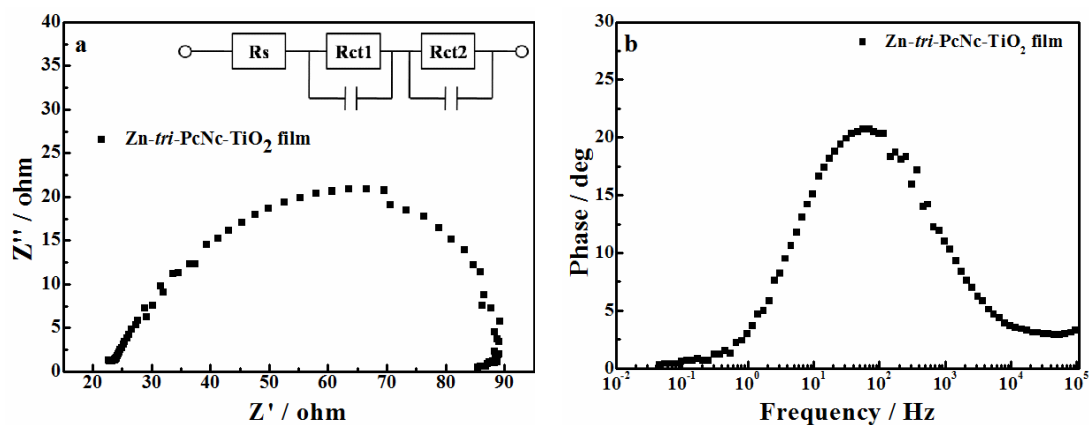

**Figure S5.** Electrochemical impedance spectra (EIS) of the solar cells fabricated with **Zn-tri-PcNc/TiO<sub>2</sub>** electrode. (a) Nyquist plot; (b) Bode phase plot.

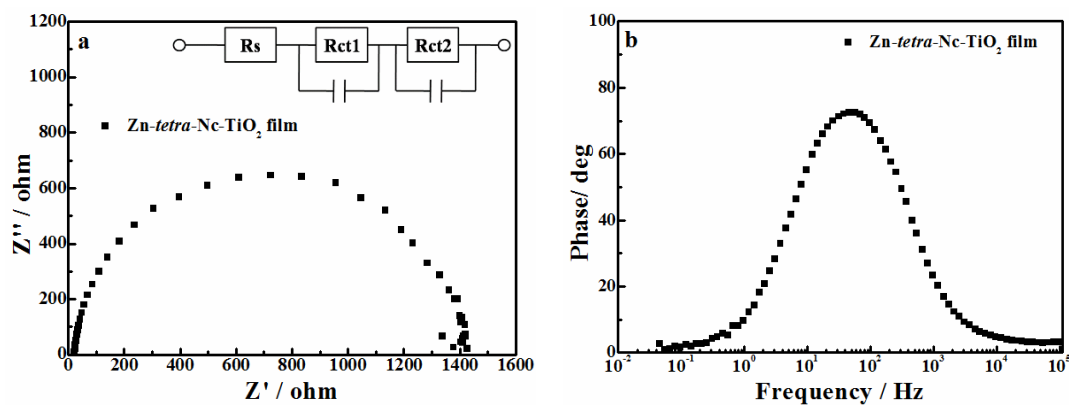

**Figure S6.** Electrochemical impedance spectra (EIS) of the solar cells fabricated with **Zn-tetra-Nc/TiO<sub>2</sub>** electrode. (a) Nyquist plot; (b) Bode phase plot.

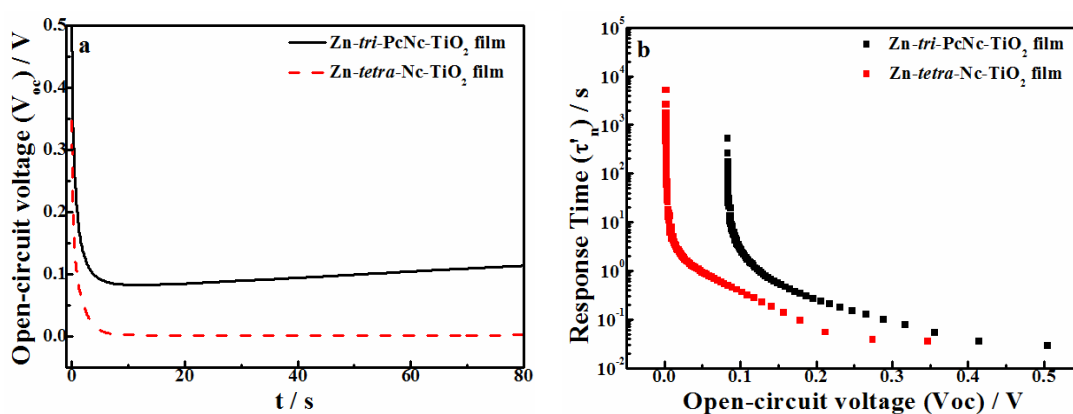

**Figure S7.** Open-circuit voltage decay (OCVD) curves (a) and corresponding  $\tau_n \sim V_{OC}$  curves (b) of the solar cells fabricated with **Zn-tri-PcNc/TiO<sub>2</sub>** and **Zn-tetra-Nc/TiO<sub>2</sub>** film electrode.

PE300BFA  
CERMAX® XENON SHORT-ARC LAMPS

Spectral Output

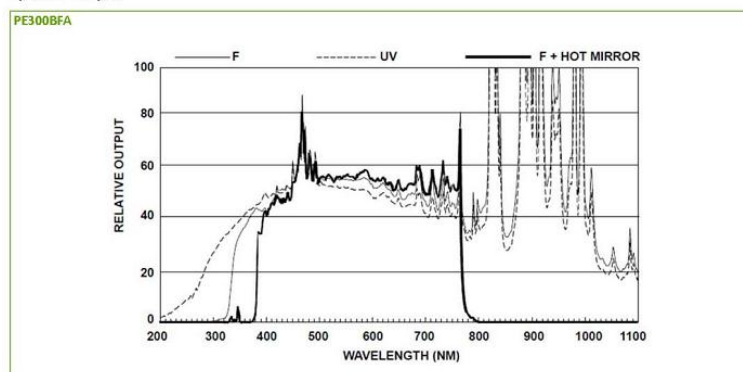

**Figure S8.** Emission spectrum of Xe-lamp provided by Excelitas Technologies can be seen at [http://www.excelitas.com/downloads/DTS\\_PE300BFA.pdf](http://www.excelitas.com/downloads/DTS_PE300BFA.pdf). F = UV filtered output.
